# Supplementary material
Source: publisher figshare collection journal article supplement (https://acs.figshare.com/ndownloader/files/5110192)
Supplement: Supplementary file 1 [file 5110192]

## Supplemental Material

### *Efficient Construction of the Oxa-tricyclo[6.3.1.0<sup>0,0</sup>]dodecane Core of Komaroviquinone Using a Cyclization/Cycloaddition Cascade of a Rhodium Carbenoid Intermediate*

*Albert Padwa\*, Jutatip Boonsombat, Paitoon Rashatasakhon,  
and Jerremey Willis*

*Department of Chemistry, Emory University, Atlanta, GA 30322*

chemap@emory.edu

#### Experimental Section

Melting points are uncorrected. Mass spectra were determined at an ionizing voltage of 70 eV. Unless otherwise noted, all reactions were performed in flame-dried glassware under an atmosphere of dry argon. The microwave reactor and reaction vessels were purchased from CEM Corporation. All solids were recrystallized from ethyl acetate/hexane for analytical data.

**$\alpha$ -Methoxycarbonyl- $\alpha$ -diazoacetophenone (7).** To a 5.0 g (28 mmol) sample of phthalic acid monomethyl ester was added 24 mL (0.28 mol) of thionyl chloride at rt. The mixture was stirred at rt for 3 h and then the excess thionyl chloride was removed under reduced pressure. The crude residue was redissolved in 200 mL of Et<sub>2</sub>O. An ethereal solution of diazomethane, prepared by addition of 32 g (0.15 mol) of diazald (*N*-methyl-*N*-nitroso-*p*-toluenesulfonamide) in 60 mL of Et<sub>2</sub>O to 7.7 g (0.14 mol) of potassium hydroxide in 12 mL of water and 37 mL of ethanol, was added to the above acid chloride solution at 0 °C. After the addition was completed, the reaction mixture was allowed to warm up to rt. Silica gel was added, the mixture was stirred for 5 min., filtered, and the solvent was removed under reduced pressure. The crude mixture was purified by flash silica gel column

chromatography using a 40% EtOAc/hexane mixture as the eluent to provide 5.1 g (99%) of the titled compound<sup>1</sup> as a yellow solid: mp 61-62 °C; IR (neat) 3094, 2100, 1726, 1619, and 1352 cm<sup>-1</sup>; <sup>1</sup>H-NMR (400 MHz, CDCl<sub>3</sub>) δ 3.88 (s, 3H), 5.58 (brs, 1H), 7.39 (dd, 1H, *J* = 7.2 and 2.0 Hz), 7.44-7.52 (m, 2H) and 7.80 (brs, 1H); <sup>13</sup>C-NMR (100 MHz, CDCl<sub>3</sub>) δ 52.5, 56.1, 126.8, 129.8, 130.3, 130.8, 131.5, 139.6, 167.4 and 188.7.

**Methyl 2-(3-oxooct-7-enoyl)benzoate (8).** To a solution containing 0.09 g (0.88 mmol) of hex-5-enal<sup>2</sup> and 0.01 g of SnCl<sub>2</sub> (0.1 mmol) in 1 mL of CH<sub>2</sub>Cl<sub>2</sub> was added 0.15 g (0.74 mmol) of the above diazo ketone **7** in 2 mL of CH<sub>2</sub>Cl<sub>2</sub>. The mixture was stirred at rt for 1 h, diluted with CH<sub>2</sub>Cl<sub>2</sub> and washed with water. The organic phase was dried over Na<sub>2</sub>SO<sub>4</sub>. The solvent was removed under reduced pressure and the crude mixture was purified by flash silica gel column chromatography using a 30% EtOAc/hexane mixture as the eluent to provide 0.04 g (41%) of the titled compound as a yellow oil: IR (neat) 1734, 1727, 1545, 1396, 1292, and 1063 cm<sup>-1</sup>; <sup>1</sup>H-NMR (400 MHz, CDCl<sub>3</sub>) δ 1.81-1.90 (m, 2H), 2.15 (q, 2H, *J* = 6.7 Hz), 2.62 (q, 2H, *J* = 7.6 Hz), 3.87 (s, 3H), 5.00- 5.08 (m, 5H), 5.70-5.82 (m, 1H), 6.28 (s, 1H), 7.57-7.66, (m, 3H) and 7.82- 7.86 (m, 1H); <sup>13</sup>C-NMR (100 MHz, CDCl<sub>3</sub>) δ 24.8, 32.9, 37.2, 53.0, 100.2, 116.3, 129.0, 130.4, 131.4, 132.2, 132.8, 133.3, 136.9, 167.2, 186.4 and 196.8; HRMS Calcd for C<sub>16</sub>H<sub>18</sub>O<sub>4</sub>: 274.1206. Found: 274.1204.

**Methyl 2-(2-Diazo-3-oxooct-7-enoyl)benzoate (9).** To a solution containing 0.09 g (0.33 mmol) of the above 1,3-dione **8** in 3.0 mL of CH<sub>3</sub>CN was added 0.14 mL (0.98 mmol) of Et<sub>3</sub>N and 0.07 g (0.39 mmol) of *p*-nitrobenzenesulfonyl azide<sup>3</sup> at rt. The mixture was stirred at rt for 1 h, the solvent was removed under reduced pressure and the crude residue was purified by flash silica gel column chromatography using a 10% EtOAc/hexane mixture as the eluent to provide 0.1 g (98%) of the titled compound as a pale yellow oil: IR (neat) 2120, 1721, 1656 and 1195 cm<sup>-1</sup>; <sup>1</sup>H-NMR (400 MHz, CDCl<sub>3</sub>) δ 1.71-1.77 (m, 2H), 2.09 (q, 2H, *J* = 6.7 Hz), 2.83 (brs, 2H), 3.87 (s, 3H), 4.95 (d, 1H, *J*

= 10.5 Hz), 5.00 (d, 1H,  $J$  = 17.1 Hz), 5.71-5.81 (m, 1H), 7.34 (d, 1H,  $J$  = 7.6 Hz), 7.54 (td, 1H,  $J$  = 7.6 and 1.0 Hz), 7.62 (td, 1H,  $J$  = 7.6 and 1.0 Hz) and 8.03 (d, 1H,  $J$  = 7.6 Hz);  $^{13}\text{C}$ -NMR (100 MHz,  $\text{CDCl}_3$ )  $\delta$  23.1, 33.0, 40.2, 52.6, 85.8, 115.2, 126.3, 127.6, 130.1, 130.6, 132.9, 137.6, 140.5, 165.8, 186.4 and 191.8.

**8-Methoxy-12-oxa-tricyclo[6.3.1.0.<sup>0,0</sup>]octahydro-dibenzo[*a,d*]-4,11-dione (10).**

To a solution containing 0.13 g (0.43 mmol) of the above diazodione **9** in 5 mL of benzene was added 0.01 g (0.02 mmol) of  $\text{Rh}_2(\text{OAc})_4$  at rt. The mixture was heated for 30 min at 80 °C. The reaction mixture was cooled to rt and the solvent was removed under reduced pressure. The crude residue was purified by flash silica gel column chromatography using a 50% EtOAc/hexane mixture as the eluent to provide 0.03 g (75%) of the titled compound as a pale yellow solid: mp 165-166 °C; IR (neat) 3025, 2910, 1726, 1693, 1600, 1305, and 1281  $\text{cm}^{-1}$ ;  $^1\text{H}$ -NMR (400 MHz,  $\text{CDCl}_3$ )  $\delta$  1.39-1.52 (m, 1H), 1.92-2.12 (m, 4H), 2.32 (dd, 1H,  $J$  = 12.4 and 5.6 Hz), 2.51-2.63 (m, 2H), 2.84-2.95 (m, 1H), 3.50 (s, 3H), 7.42-7.50 (m, 2H), 7.63 (td, 1H,  $J$  = 7.3 and 1.3 Hz) and 7.99 (dd, 1H,  $J$  = 8.3 and 1.3 Hz);  $^{13}\text{C}$ -NMR (100 MHz,  $\text{CDCl}_3$ )  $\delta$  21.7, 28.4, 37.2, 41.9, 42.0, 52.8, 90.1, 106.5, 123.5, 127.5, 128.9, 129.9, 134.5, 144.7, 193.0 and 205.8; Anal. Calcd. for  $\text{C}_{16}\text{H}_{16}\text{O}_4$ : C, 70.56; H, 5.93.

Found: C, 70.48; H, 5.75.

**6a-Hex-5-enoyl-1a-methoxy-1a,6a-dihydro-1-oxa-cyclopropa[*a*]inden-6-one**

**(12).** To a solution containing 0.1 g (0.33 mmol) of the above diazodione **9** in 3 mL of benzene was added 0.01 g (0.02 mmol) of  $\text{Rh}_2(\text{OAc})_4$  at rt. The mixture was stirred at rt for 30 min, the solvent was removed under reduced pressure and the crude residue was purified by flash silica gel column chromatography on silica gel to provide 0.054 g (71%) of the titled compound as a pale yellow solid together with 0.009 g (10%) of cycloadduct **10**: IR (neat) 1737, 1724, 1541, 1290, and 1061  $\text{cm}^{-1}$ ;  $^1\text{H}$ -NMR (400 MHz,  $\text{CDCl}_3$ )  $\delta$  1.67-1.87 (m, 2H), 2.05-2.20 (m, 2H), 2.80-2.99 (m, 2H), 3.42 (s, 3H), 4.94-5.08 (m, 2H), 5.76-5.88 (m, 1H), 7.28 (td, 1H,  $J$  = 7.9 and

1.3 Hz), 7.41 (ddd, 2H,  $J = 15.9, 7.9$  and  $1.0$  Hz) and 7.58 (td, 1H,  $J = 7.9$  and  $1.3$  Hz);  $^{13}\text{C}$ -NMR (100 MHz,  $\text{CDCl}_3$ )  $\delta$  23.0, 33.0, 40.3, 51.9, 90.3, 99.5, 115.0, 125.6, 127.2, 129.5, 130.1, 134.7, 137.4, 138.3, 187.0 and 197.8; Anal. Calcd. for  $\text{C}_{16}\text{H}_{16}\text{O}_4$ : C, 70.56; H, 5.93. Found: C, 70.33; H, 5.81.

Heating a sample of epoxide **12** in benzene at  $100\text{ }^\circ\text{C}$  for 2 h afforded cycloadduct **10** in 78% yield.

**8-Hydroxy-12-oxa-tricyclo[6.3.1.0.<sup>0,0</sup>]octahydro-dibenzo[*a,d*]-4,11-dione.** To a solution containing 0.1 g of **10** in a 1:2:1-mixture of THF/MeOH/ $\text{H}_2\text{O}$  (2mL) was added 0.5 mL of HCl (conc.). The mixture was heated to reflux for 6 h, cooled and extracted with EtOAc. The combined organic layer was dried over  $\text{MgSO}_4$ . The solvent was removed under reduced pressure and the crude mixture was purified by flash silica gel column chromatography using a 50% EtOAc/hexane mixture as the eluent to provide 0.08 g (84%) of the titled compound as a yellow solid: mp  $156\text{--}158\text{ }^\circ\text{C}$ ; IR (KBr) 3425, 2939, 1721, 1692 and  $1289\text{ cm}^{-1}$ ;  $^1\text{H}$ -NMR (400 MHz,  $\text{CDCl}_3$ )  $\delta$  1.32 (qd, 1H,  $J = 12.7$  and  $4.8$  Hz), 1.86- 2.06 (m, 3H), 1.96 (dd, 1H,  $J = 12.0$  and  $6.7$  Hz), 2.32 (dd, 1H,  $J = 12.0$  and  $8.6$  Hz), 2.38 -2.47 (m, 1H), 2.53 (ddd, 1H,  $J = 16.8, 9.5$  and  $6.0$  Hz), 2.85 (ddd, 1H,  $J = 16.8, 11.1$  and  $4.8$  Hz), 5.79 (s, 1H), 7.28 (td, 1H,  $J = 7.6$  and  $1.0$  Hz) and 7.43 -7.55 (m, 3H);  $^{13}\text{C}$ -NMR (100 MHz,  $\text{CDCl}_3$ )  $\delta$  21.8, 28.1, 36.7, 41.9, 43.2, 90.6, 103.6, 123.1, 127.1, 127.5, 128.4, 134.8, 146.7, 192.6 and 207.2; Anal. Calcd. for  $\text{C}_{16}\text{H}_{16}\text{O}_4$ : C, 69.74; H, 5.47. Found: C, 69.66; H, 5.21.

**Ethyl 5-Hydroxy-2,2-dimethylpentanoate.** To a stirred solution of 24 mL (12.0 mmol) of 9-BBN (0.5 M in THF) was added a solution of 2.0 g of 2,2 dimethyl-pent-4-enoic acid ethyl ester<sup>4</sup> (12.0 mmol) in 6 mL of THF at rt. After stirring for 2 h, the reaction was cooled to  $0\text{ }^\circ\text{C}$  and 8 mL of ethanol, 2.4 mL of 6 M aq. NaOH solution, and 4.8 mL of 30% aq.  $\text{H}_2\text{O}_2$  were added consecutively. The mixture was heated at  $50\text{ }^\circ\text{C}$  for 1 h. Upon cooling, brine was added and the solution was extracted with

EtOAc. The combined organic layer was dried over  $\text{MgSO}_4$ . The solvent was removed under reduced pressure and the crude residue was purified by flash silica gel column chromatography using a 8% EtOAc/hexane mixture as the eluent to provide 1.2 g (55%) of the titled compound as a clear oil; IR (neat) 3467, 2634, 1475, 1280, 1183 and  $1055\text{ cm}^{-1}$ ;  $^1\text{H-NMR}$  (300 MHz,  $\text{CDCl}_3$ )  $\delta$  1.11 (s, 6H), 1.18 (t, 3H,  $J = 7.2\text{ Hz}$ ), 1.47 (m, 4H), 2.06 (s, 1H), 3.53 (t, 1H,  $J = 6.0\text{ Hz}$ ) and 4.06 (q, 2H,  $J = 7.2\text{ Hz}$ );  $^{13}\text{C-NMR}$  (75 MHz,  $\text{CDCl}_3$ )  $\delta$  14.1, 25.0, 28.1, 36.5, 41.7, 60.3, 62.8 and 177.9.

**Ethyl 5-(*tert*-Butyldimethylsilyloxy)-2,2-dimethylpentanoate.** To a solution containing 0.75 g (4.0 mmol) of the above alcohol in 2 mL of DMF was added 0.77 g (10.7 mmol) of imidazole and a crystal of 4-dimethylaminopyridine. The mixture was cooled to  $0\text{ }^\circ\text{C}$  for 15 min and then 0.77 g (5.0 mmol) of *tert*-butyldimethylsilyl chloride was added in one portion. The reaction was left to stir for 2 h and then quenched with  $\text{H}_2\text{O}$  and extracted with  $\text{Et}_2\text{O}$ . The combined organic layer was dried over  $\text{MgSO}_4$  and the crude residue was purified by flash silica gel column chromatography using a 10% EtOAc/hexane mixture as the eluent to provide 1.0 g (95%) of the titled compound as a clear oil: IR (neat) 2648, 1453, 1265, 1168, 1058 and  $1043\text{ cm}^{-1}$ ;  $^1\text{H-NMR}$  (300 MHz,  $\text{CDCl}_3$ )  $\delta$  0.05 (s, 6H), 0.84 (s, 9H), 1.12 (s, 6H), 1.20 (t, 3H,  $J = 7.2\text{ Hz}$ ), 1.47 (m, 4H), 3.54 (t, 2H,  $J = 6.0\text{ Hz}$ ) and 4.08 (q, 2H,  $J = 7.2\text{ Hz}$ );  $^{13}\text{C-NMR}$  (75 MHz,  $\text{CDCl}_3$ )  $\delta$  -5.3, 14.1, 25.0, 28.1, 36.5, 41.7, 60.3, 62.8 and 177.9.

**Ethyl 5-(*tert*-Butyldimethylsilyloxy)-2,2-dimethylpentanal.** To a suspension of 0.13 g (3.0 mmol) of lithium aluminum hydride in 25 mL of  $\text{Et}_2\text{O}$  at  $0\text{ }^\circ\text{C}$  was added 0.99 g (3.0 mmol) of the above ester in 10 mL of  $\text{Et}_2\text{O}$ . After stirring for 30 min, the reaction was quenched by the slow addition of 30 mL of  $\text{H}_2\text{O}$ . The aqueous layer was extracted with  $\text{Et}_2\text{O}$ , the solvent was removed under reduced pressure and the crude alcohol was taken up in 15 mL of  $\text{CH}_2\text{Cl}_2$ . This solution was added to a

stirred solution of 1.1 g (4.5 mmol) of pyridinium chlorochromate in 10 mL of  $\text{CH}_2\text{Cl}_2$  at rt. The mixture was stirred overnight, filtered and the solvent was removed under reduced pressure. The crude residue was purified by flash silica gel column chromatography using a 10% EtOAc/hexane mixture as the eluent to provide 0.59 g (70%) of the titled compound as a clear oil: IR (neat) 2950, 2919, 1700, 1470, 1383, 1255, 1096 and  $830\text{ cm}^{-1}$ ;  $^1\text{H-NMR}$  (300 MHz,  $\text{CDCl}_3$ )  $\delta$  0.01 (s, 6H), 0.85 (s, 9H), 1.15 (s, 6H), 1.52 (m, 4H), 3.60 (t, 2H,  $J = 5.7\text{ Hz}$ ) and 9.39 (s, 1H);  $^{13}\text{C-NMR}$  (75 MHz,  $\text{CDCl}_3$ )  $\delta$  -5.3, 14.1, 24.8, 28.6, 35.1, 42.6, 59.3, 61.4 and 210.3.

***tert*-Butyl-4,4-dimethylhex-5-enyloxyl dimethylsilane.** To a stirred solution of 0.48 g (1.2 mmol) of methyltriphenylphosphonium iodide in 5 mL of THF at  $0\text{ }^\circ\text{C}$  was slowly added 0.6 mL (1.2 mmol) of *n*-BuLi (2.1 M in THF). After stirring for 30 min, the solution was warmed to rt and was stirred for an additional 1 h. The mixture was cooled to  $0\text{ }^\circ\text{C}$  and a solution of 0.29 g (1.1 mmol) of the above aldehyde in 2 mL of THF was added dropwise and the mixture was allowed to warm to rt and was stirred overnight. The reaction was quenched with  $\text{H}_2\text{O}$  and extracted with  $\text{Et}_2\text{O}$ . The combined organic layer was dried over  $\text{MgSO}_4$  and the solvent was removed under reduced pressure. The crude residue was purified by flash silica gel column chromatography using a 6% EtOAc/hexane mixture as the eluent to provide 0.23 g (80%) of the titled compound as a clear oil: IR (neat) 2960, 2939, 2863, 1460, 1244 and  $1101\text{ cm}^{-1}$ ;  $^1\text{H-NMR}$  (300 MHz,  $\text{CDCl}_3$ )  $\delta$  -0.04 (s, 6H), 0.08 (s, 9H), 0.89 (s, 6H), 1.16 (m, 4H), 3.47 (t, 2H,  $J = 6.6\text{ Hz}$ ), 4.83 (d, 2H,  $J = 11.7\text{ Hz}$ ) and 5.65 (dd, 1H,  $J = 10.2\text{ Hz}$ );  $^{13}\text{C-NMR}$  (75 MHz,  $\text{CDCl}_3$ )  $\delta$  -5.3, 14.1, 25.9, 28.1, 36.2, 38.6, 63.8, 110.2 and 132.1.

**4,4-Dimethylhex-5-enal.** To a solution containing 0.45 g (1.9 mmol) of the above alkene in 8 mL of THF was added 2.3 mL (2.3 mmol) of tetra-butylammonium fluoride (1.0 M in THF) at  $0\text{ }^\circ\text{C}$ . The reaction mixture was stirred for 2 h after which a 1:1-mixture of  $\text{H}_2\text{O}$  and  $\text{Et}_2\text{O}$  was added to the solution. The aqueous layer was

extracted with Et<sub>2</sub>O and the combined organic layer was dried over MgSO<sub>4</sub>. The solvent was removed under reduced pressure and the crude alcohol was redissolved in 3 mL of CH<sub>2</sub>Cl<sub>2</sub>. The mixture was added to a stirred solution of 0.6 g (2.7 mmol) of pyridinium chlorochromate in 2 mL of CH<sub>2</sub>Cl<sub>2</sub> at rt. The solution was stirred overnight, filtered and the solvent was removed under reduced pressure. The crude residue was purified by flash silica gel column chromatography using a 6% EtOAc/hexane mixture as the eluent to provide 0.19 g (80%) of the titled compound<sup>5</sup> as a clear oil: <sup>1</sup>H-NMR (300 MHz, CDCl<sub>3</sub>) δ 0.96 (s, 6H), 1.60 (t, 2H, *J* = 8.4 Hz), 2.20 (t, 2H, *J* = 8.4 Hz), 4.90 (dd, 2H, *J* = 9.3 Hz) and 5.66 (dd, 1H, *J* = 11.1 Hz); <sup>13</sup>C-NMR (75 MHz, CDCl<sub>3</sub>) δ 26.3, 26.4, 29.8, 36.1, 36.6, 111.4, 146.8 and 180.2.

**Methyl 2-(6,6-Dimethyl-3-oxo-oct-7-enyl)benzoate.** To a solution containing 0.34 g (1.6 mmol) of diazo ketone **7** and 0.03 g (0.16 mmol) of anhydrous SnCl<sub>2</sub> in 4 mL of CH<sub>2</sub>Cl<sub>2</sub> was added a solution of 0.25 g (1.9 mmol) of the above aldehyde in 4 mL of CH<sub>2</sub>Cl<sub>2</sub> and the mixture was stirred at rt for 18 h. The solution was quenched with H<sub>2</sub>O and extracted with Et<sub>2</sub>O. The combined organic layer was dried over MgSO<sub>4</sub> and the crude residue was purified by flash silica gel column chromatography using a 20% EtOAc/hexane mixture as the eluent to provide 1.0 g (20%) of the titled compound as a clear oil: IR (neat) 3210, 2113, 1721, 1700, 1588 and 1434 cm<sup>-1</sup>; <sup>1</sup>H-NMR (300 MHz, CDCl<sub>3</sub>) δ 1.00 (s, 6H), 1.64 (m, 2H), 2.28 (m, 2H), 3.83 (s, 3H), 4.96 (m, 2H), 5.75 (t, 1H, *J* = 8.1 Hz), 5.81 (s, 1H) and 7.52 (s, 4H); <sup>13</sup>C-NMR (75 MHz, CDCl<sub>3</sub>) δ 26.5, 33.9, 36.4, 38.0, 52.5, 98.9, 111.5, 127.9, 129.5, 130.5, 131.1, 137.5, 147.1, 188.4 and 194.4; HRMS Calcd for C<sub>18</sub>H<sub>22</sub>O<sub>4</sub>: 302.1518. Found: 302.1516.

**Methyl 2-(2-diazo-6,6-dimethyl-3-oxooct-7-enyl)benzoate (13).** To a solution containing 1.0 g (0.32 mmol) of the above diketoester and 0.11 g (0.44 mmol) of *p*-nitrobenzenesulfonyl azide<sup>3</sup> in 3 mL of CH<sub>3</sub>CN at 0 °C was added 0.09 g (0.65

mmol) of Et<sub>3</sub>N. The reaction mixture was stirred for 3 h, the solvent was removed under reduced pressure and the crude residue was purified by flash silica gel column chromatography using a 50% EtOAc/hexane mixture as the eluent to provide 0.4 g (38%) of the titled compound as a clear oil: IR (neat) 3105, 2921, 2131, 1712, 1656 and 1534 cm<sup>-1</sup>; <sup>1</sup>H-NMR (300 MHz, CDCl<sub>3</sub>) δ 0.86 (s, 6H), 1.52 (m, 2H), 2.54 (m, 2H), 3.76 (s, 3H), 4.79 (m, 2H), 5.59 (dd, 1H, *J* = 6.6 Hz), 7.49 (dt, 2H, *J* = 8.1 Hz), 8.05 (d, 1H, *J* = 8.4 Hz) and 8.35 (d, 1H, *J* = 9 Hz); <sup>13</sup>C-NMR (75 MHz, CDCl<sub>3</sub>) δ 26.4, 35.9, 36.2, 36.9, 52.6, 111.3, 124.9, 126.4, 127.7, 128.8, 130.1, 130.6, 132.9, 147.1 and 165.8.

**1,1-Dimethyl-8-methoxy-12-oxa-tricyclo[6.3.1.0.<sup>0,0</sup>]octahydro-dibenzo[*a,d*]-4,11-dione (14).** To a solution containing 0.04 g (0.12 mmol) of diazo-dione **13** in 1 mL of benzene was added 0.004 g (0.01 mmol) of Rh<sub>2</sub>(OAc)<sub>4</sub>. The mixture was heated at 80 °C for 18 h. The solution was filtered and the solvent was removed under reduced pressure. The crude residue was purified by flash silica gel column chromatography using a 6% EtOAc/hexane mixture as the eluent to provide 0.012 g (92%) of the titled compound as a clear oil; IR (neat) 1682, 1623, 1269, 1058 and 1009 cm<sup>-1</sup>; <sup>1</sup>H-NMR (300 MHz, CDCl<sub>3</sub>) δ 0.92 (s, 6H), 1.80 (dd, 1H, *J* = 7.2 Hz), 1.93 (m, 1H), 2.07 (t, 1H, *J* = 9.0 Hz), 2.18 (dd, 1H, *J* = 9.0 Hz), 2.39 (t, 1H, *J* = 6.3 Hz), 2.64 (m, 1H), 2.78 (dd, 1H, *J* = 7.2 Hz), 3.49 (s, 3H), 7.45 (t, 2H, *J* = 5.4 Hz), 7.64 (t, 1H, *J* = 5.4 Hz) and 7.97 (d, 1H, *J* = 5.7 Hz); <sup>13</sup>C-NMR (100 MHz, CDCl<sub>3</sub>) δ 20.2, 29.7, 32.9, 35.7, 36.1, 36.4, 51.4, 52.7, 88.6, 106.5, 123.6, 127.4, 128.9, 129.6, 134.4, 144.6, 193.1 and 206.7; HRMS (FAB) Calcd for [(C<sub>18</sub>H<sub>20</sub>O<sub>4</sub>)+Li]<sup>+</sup>: 300.1361. Found 300.1373.

## References:

1. (a) Dugggleby, P. M.; Holt, G. *J. Chem. Soc.* **1962**, 3579. (b) Ueda, K.; Ibata, T.; Takebayashi, M. *Bull. Chem. Soc. Jpn.* **1972**, 45, 2779. (c) Hodson, D.; Holt, G.; Wall, D.K. *J. Chem. Soc. C* **1970**, 971.



2. (a) Banwell, M. G.; Bissett, B. D.; Bui, C. T.; Pham, H. T. T.; Simpson, G. W. *Aust. J. Chem.* **1998**, *51*, 9. (b) Meyer, C.; Marek, I.; Courtemanche, G.; Normant, J.-F. *Tetrahedron* **1994**, *50*, 1165. (c) Miyata, O.; Muroya, K.; Kobayashi, T.; Yamanaka, R.; Kajisa, S.; Koide, J.; Naito, T. *Tetrahedron* **2002**, *58*, 4459.
3. Reagan, M. T.; Nickon, A. *J. Am. Chem. Soc.* **1968**, *90*, 4096.
4. Baldwin, J. E.; Walker, J. E. *J. Chem. Soc. Chem. Comm.*, **1973**, 117.
5. Kossanyi J.; Guiard, B.; Furth, B. *Bull. Soc. Chem. Fr.*, **1974**, 305.
